# Supplementary material
Source: publisher figshare collection journal article supplement (https://springernature.figshare.com/ndownloader/files/21633762)
Supplement: Supplementary file 1 [file 21633762]

**Table S2.** Raw data of age, sex parameters in inherited tubulopathy.

| case | Age | Sex | Dx |  | Author | reference |  |  |  |  |  | V2 (iRHUC) | V1(ITIKD) |  |  | V2 (Female) | V1 (male) | iRHUC | V2 (female) | V1(male) |
| --- | --- | --- | --- | --- | --- | --- | --- | --- | --- | --- | --- | --- | --- | --- | --- | --- | --- | --- | --- | --- |
| CR 2 | 56 | F | FJHN |  | Igushi | 10 |  |  |  |  |  | 25 | 56 |  |  | 56 | 16 |  | 12.1 | 25 |
| CR 3 | 16 | M | FJHN |  | Lee 2013 | 11 |  |  |  |  |  | 24 | 16 |  |  | 16 | 16 |  | 16 | 24 |
| CR 4 | 16 | M | FJHN |  | lee 2010 | 12 |  |  |  |  |  | 24 | 16 |  |  | 14 | 42 |  | 42 | 24 |
| CR 5 | 25 | M | RHUC 1 |  | Hyun kim | 13 |  |  |  |  |  | 34 | 16 |  |  | 24 | 28 |  | 27 | 34 |
| CR 6 | 24 | M | RHUC 2 |  | Jeanine | 14 |  |  |  |  |  | 12.1 | 14 |  |  | 31 | 18 |  | 12 | 9 |
| CR 7 | 24 | M | RHUC1 |  | Oh kim | 15 |  |  |  |  |  | 9 | 24 |  |  | 5 | 16 |  | 11 | 0.83 |
| CR 8 | 34 | M | RHUC |  | Nakajima | 16 |  |  |  |  |  | 0.83 | 42 |  |  | 0.75 | 6 |  |  | 40 |
| CR 9 | 12.1 | F | RHUC2 |  | shen | 17 |  |  |  |  |  | 40 | 31 |  |  | 57 | 36 |  |  | 14 |
| CR 10 | 9 | M | RHUC 1 |  | vidanapathi | 18 |  |  |  |  |  | 14 | 28 |  |  | 33 | 13 |  |  | 14 |
| CR 11 | 16 | F | ADTKD-UMOD |  | lin 2018 | 19 |  |  |  |  |  | 14 | 18 |  |  | 24 | 14 |  |  | 12 |
| CR 12 | 14 | F | FJHN |  | Alaygut | 20 |  |  |  |  |  | 12 | 16 |  |  | 53 | 21 |  |  | 21 |
| CR 13 | 24 | F | FJHN |  | calado | 21 |  |  |  |  |  | 16 | 6 |  |  | 62 | 17 |  |  | 38 |
| CR 14 | 10 mo | M | RHUC1 |  | Han | 22 |  |  |  |  |  | 21 | 5 |  |  | 16 | 25 |  |  | 5 |
| CR 15 | 40 | M | ALPE1 |  | Ishikawa | 23 |  |  |  |  |  | 42 | 0.75 |  |  | 44 | 26 |  |  | 16 |
| CR 16 | 14 | M | ALPE1 |  | Ishikawa | 23 |  |  |  |  |  | 38 | 36 |  |  | 29 | 3 |  |  | 21 |
| CR 17 | 42 | M | ADTKD-UMOD |  | Pajak | 24 |  |  |  |  |  | 5 | 57 |  |  | 18 | 29 |  |  | 16 |
| CR 18 | 31 | F | FJHN-UKAD |  | Kuma | 25 |  |  |  |  |  | 27 | 33 |  |  | 25 | 17 |  |  | 18 |
| CR 19 | 28 | M | FJHN |  | Malakoutian | 26 |  |  |  |  |  | 16 | 24 |  |  | 30 | 40 |  |  | 9 |
| CR 20 | 18 | M | FJHN |  | Nakayama | 27 |  |  |  |  |  | 21 | 13 |  |  | 16 | 16 |  |  | 10 |
| CR 21 | 16 | M | FJHN |  | Plum | 28 |  |  |  |  |  | 16 | 14 |  |  | 18 |  |  | 6 over 25 | 19/25 |
| CR 22 | 6 | M | FJHN |  | schaffer | 29 |  |  |  |  |  | 18 | 53 |  |  | 41 | ITIKD |  |  |  |
| CR 23 | 5 | F | FJHN |  | schaffer | 29 |  |  |  |  |  | 9 | 21 |  |  | 21/40 | 19/40 |  |  |  |
| CR 24 | 9 mo | F | FJHN |  | schaffer | 29 |  |  |  |  |  | 10 | 17 |  |  |  |  |  |  |  |
| CR 25 | 36 | M | FJHN |  | schaffer | 29 |  |  |  |  |  | 12 | 25 |  |  |  |  |  |  |  |
| CR 26 | 14 | M | RHUC2 |  | stirbukova-2012 | 30 |  |  |  |  |  | 11 | 62 |  |  |  |  |  |  |  |
| CR 27 | 12 | M | RHUC2 |  | stiburkowa-2012 | 30 |  |  |  |  |  |  | 16 |  |  |  |  |  |  |  |
| CR 28 | 16 | F | RHUC2 |  | stirbuko-2011 | 31 |  |  |  |  |  |  | 26 |  |  |  |  |  |  |  |
| CR 29 | 21 | M | RHUC2 |  | stibur-2011 | 31 |  |  |  |  |  |  | 3 |  |  |  |  |  |  |  |
| CR 30 | 57 | F | FJHN |  | Tinschert | 32 |  |  |  |  |  |  | 44 |  |  |  |  |  |  |  |
| CR 31 | 33 | F | FJHN |  | Tinschert | 32 |  |  |  |  |  |  | 29 |  |  |  |  |  |  |  |
| CR 32 | 24 | F | MCKD2 |  | wolf | 33 |  |  |  |  |  |  | 18 |  |  |  |  |  |  |  |
| CR 33 | 13 | M | FJHN |  | wolf | 33 |  |  |  |  |  |  | 25 |  |  |  |  |  |  |  |
| CR 34 | 14 | M | FJHN |  | wolf | 33 |  |  |  |  |  |  | 30 |  |  |  |  |  |  |  |
| CR 35 | 53 | F | MCKD2 |  | wolf | 33 |  |  |  |  |  |  | 29 |  |  |  |  |  |  |  |
| CR 36 | 21 | M | MCKD2 |  | wolf | 33 |  |  |  |  |  |  | 16 |  |  |  | t-Test: Two-Sample Assuming Unequal Variances |  |  |  |
| CR 37 | 42 | F | RHUC1 |  | stiburkova-2013 | 34 |  |  |  |  |  |  | 17 |  |  |  |  |  |  |  |
| CR 38 | 38 | M | RHUC1 |  | stiburkova-2013 | 34 |  |  |  |  |  |  | 18 |  |  |  |  | *Variable 1* | *Variable 2* |  |
| CR 39 | 5 | M | RHUC1 |  | stiburkova-2013 | 34 |  |  |  |  |  |  | 40 |  |  |  | Mean | 21 | 29.17857 |  |
| CR 40 | 27 | F | RHUC1 |  | Zhou | 35 |  |  |  |  |  |  | 41 |  |  |  | Variance | 110.2222 | 299.0696 |  |
| CR 41 | 16 | M | RHUC2 |  | Windpess | 36 |  |  |  |  |  |  | 16 |  |  |  | Observations | 19 | 21 |  |
| CR 42 | 21 | M | RHUC1 |  | Yan | 37 |  |  |  |  |  |  |  |  |  |  | Hypothesized Mean Difference | 0 |  |  |
| CR 43 | 17 | M | FJHN |  | Saxena | 38 |  |  |  |  |  | 25/65 | 40/65 |  |  |  | df | 33 |  |  |
| CR 44 | 25 | M | FJHN |  | Saxena | 38 |  |  |  |  |  |  |  |  |  |  | t Stat | -1.82684 |  |  |
| CR 45 | 16 | M | IRH1 |  | Hirashio | 39 |  |  |  |  |  |  |  |  |  |  | P(T<=t) one-tail | 0.03839 |  |  |
| CR 46 | 18 | M | IRH1 |  | Bhasin | 40 |  |  |  |  |  |  |  |  |  |  | t Critical one-tail | 1.69236 |  |  |
| CR 47 | 9 | M | IRH1 |  | Jasinge | 41 |  |  |  |  |  |  |  |  |  |  | P(T<=t) two-tail | 0.076781 |  |  |
| CR48 | 62 | F | FJHN |  | Lopes | 42 | 10 mo=0.83 | 9mo=0.75 |  |  |  |  |  |  |  |  | t Critical two-tail | 2.034515 |  |  |
| CR 49 | 16 | F | UAK |  | Wheeler | 43 |  |  |  |  |  |  |  |  |  |  |  |  |  |  |
| CR 50 | 26 | M | ADTKD |  | Yildiz | 44 |  |  |  |  |  |  |  |  |  |  |  |  |  |  |
| CR 51 | 3 | M | ADTKD |  | Yang | 45 |  |  |  |  |  |  |  |  |  |  |  |  |  |  |
| CR52 | 44 | F | ADTKD |  | Martin-Gomez | 46 |  |  |  |  |  |  |  |  |  |  |  |  |  |  |
| CR 53 | 29 | F | ADTKD |  | Reindel | 47 |  |  |  |  |  |  |  |  |  |  |  |  |  |  |
| CR 54 | 18 | F | ADTKD |  | Rampoldi | 48 |  |  |  |  |  |  |  |  |  |  |  |  |  |  |
| CR55 | 25 | F | ADTKD |  | Rampoldi | 48 |  |  |  |  |  |  |  |  |  |  |  |  |  |  |
| CR56 | 30 | F | ADTKD |  | Rampoldi | 48 |  |  |  |  |  |  |  |  |  |  |  |  |  |  |
| CR57 | 29 | M | ADTKD |  | Rampoldi | 48 |  |  |  |  |  |  |  |  |  |  |  |  |  |  |
| CR58 | 16 | F | ADTKD |  | Rampoldi | 48 |  |  |  |  |  |  |  |  |  |  |  |  |  |  |
| CR59 | 17 | M | ADTKD |  | Rampoldi | 48 |  |  |  |  |  |  |  |  |  |  |  |  |  |  |
| CR60 | 18 | F | ADTKD |  | Rampoldi | 48 |  |  | yellow=ITIKD |  |  | ITIKD=40/65 |  |  |  |  |  |  |  |  |
| CR 61 | 40 | M | ADTKD |  | Rampoldi | 48 |  |  | blue=female |  |  | iRHUC=25/65 |  |  |  |  |  |  |  |  |
| CR 62 | 41 | F | ADTKD |  | Rampoldi | 48 |  |  | pink=male |  |  |  |  |  |  |  |  |  |  |  |
| CR 63 | 16 | M | ADTKD |  | Rampoldi | 48 |  |  | White=iRHUC |  |  |  |  |  |  |  |  |  |  |  |
| CR 64 | 10 | M | IRH1 |  | Vidal | 49 |  |  |  |  |  |  |  |  |  |  |  |  |  |  |
| CR 65 | 12 | F | IRH1 |  | Vidal | 49 |  |  |  |  |  |  |  |  |  |  |  |  |  |  |
| CR 66 | 11 | F | IRH2 |  | Vidal | 49 |  |  |  |  |  |  |  |  |  |  |  |  |  |  |

ITIKD, inherited tubulointerstitial kidney disease; iRHUC, inherited renal hypouricemia.
